# Supplementary material for: Facile fabrication of a multifunctional aramid nanofiber-based composite paper
Source: Royal Society of Chemistry journal article supplement (doi:10.1039/c6ra15895a), 2016-01-01
Supplement: c6ra15895a1.pdf [file c6ra15895a1.pdf]

## Supporting Information

**Facile Fabrication of Multifunctional Aramid Nanofiber-based Composite Paper**

**Jianbo Li<sup>a</sup>, Jinchun Fan<sup>a\*</sup>, Kexuan Liao<sup>a</sup>, Jiawei Xie<sup>a</sup>, Yihui Chen<sup>a</sup>, Peng Liu<sup>a</sup>,  
Yulin Min<sup>a</sup> and Qunjie Xu<sup>a\*</sup>**

**<sup>a</sup> Shanghai Key Laboratory of Materials Protection and Advanced Materials in Electric Power, College of Environmental and Chemical Engineering, Shanghai University of Electric Power, Shanghai, 200090, China**

**\* E-mail: [Jinchun.fan@shiep.edu.cn](mailto:Jinchun.fan@shiep.edu.cn) (J.C. Fan), [xuqunjie@shiep.edu.cn](mailto:xuqunjie@shiep.edu.cn) (Q.J. Xu)**

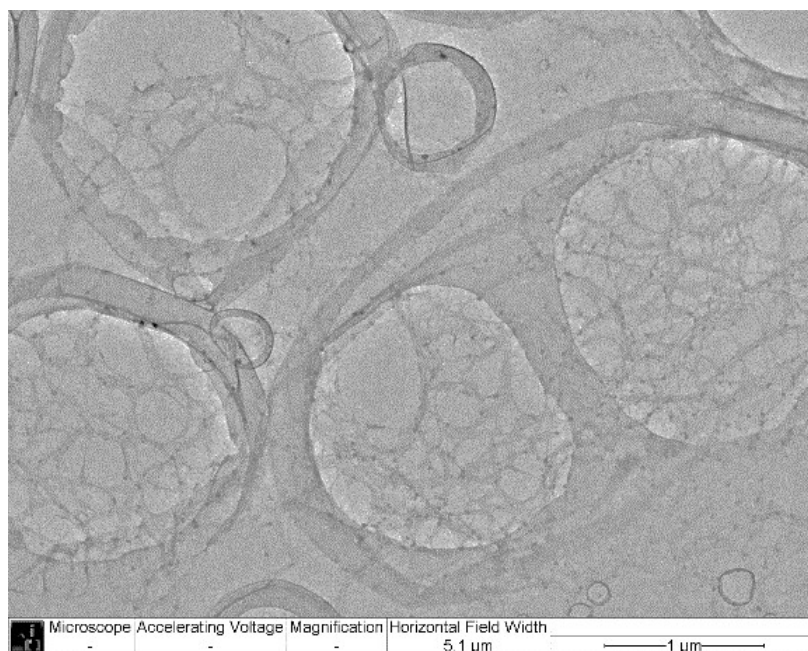

Figure S1. TEM images of ANFs .

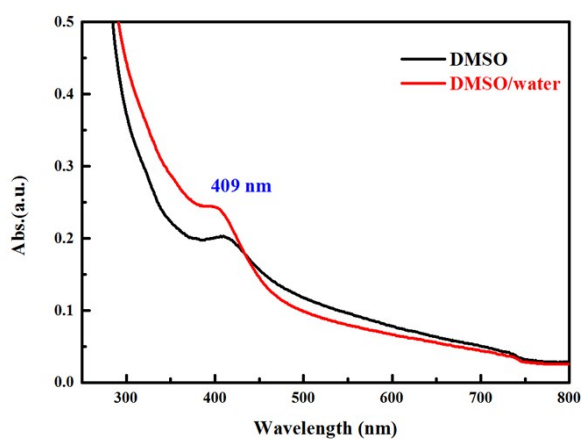

Figure S2. UV-Vis spectra of DMSO and DMSO/water-reduced Ag NPs dispersions.

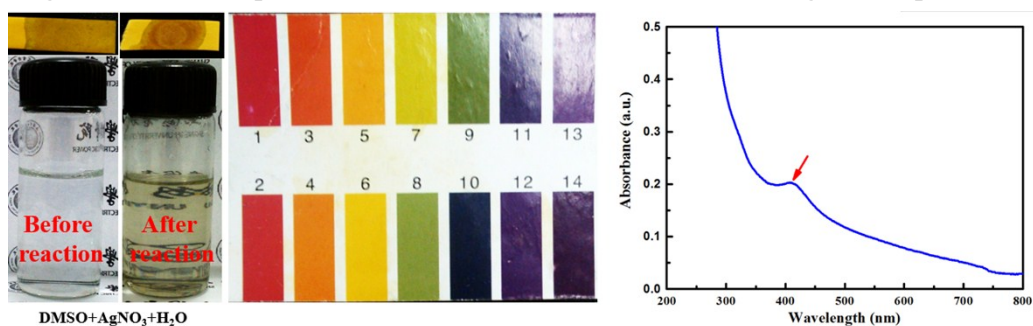

Figure S3. Photographs of  $\text{AgNO}_3$  in DMSO/water mixed solvent and the change of pH of before and after reaction.

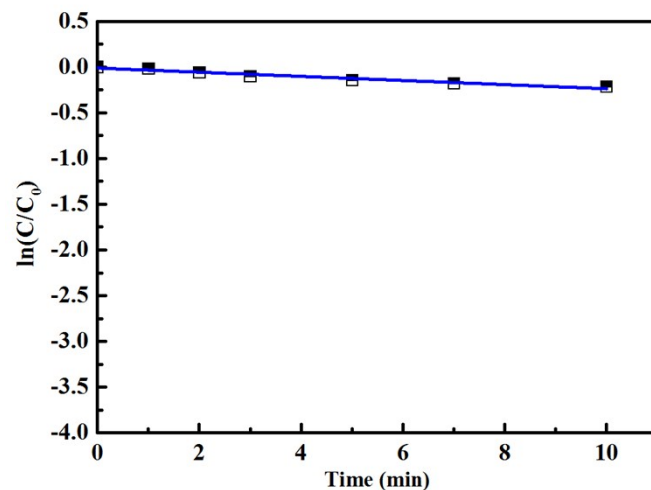

Figure S4. Catalytic kinetic curve for or single  $\text{NaBH}_4$  and 4-NP without Ag/ANFs composites

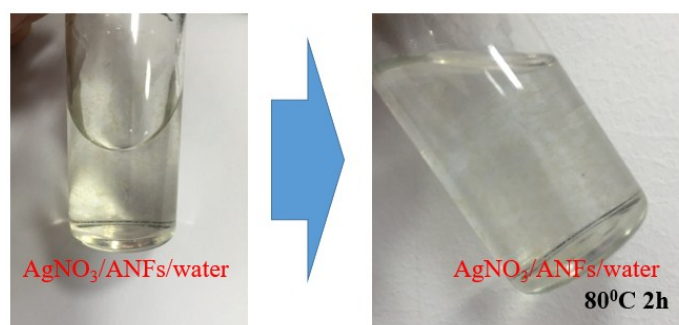

Figure S5. Photograph of  $\text{AgNO}_3/\text{ANFs}/\text{water}$  dispersion before and after reaction

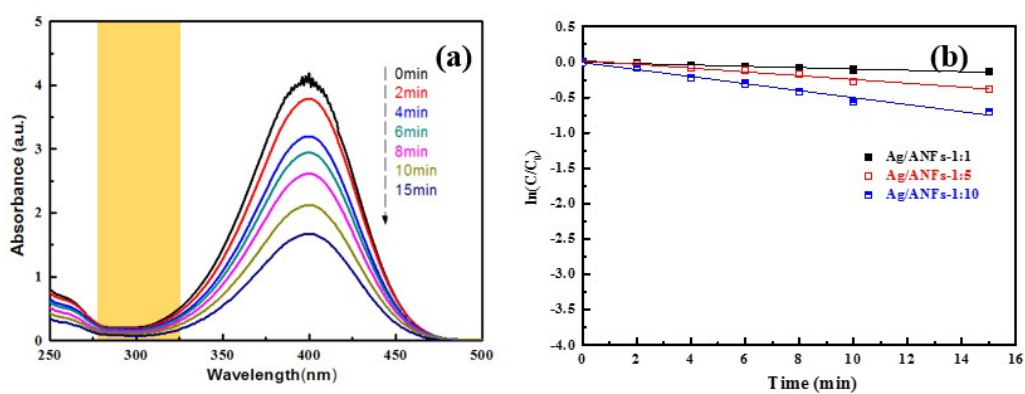

Figure S6. (a) UV-Vis adsorption spectra of Ag/ANFs-1:10 composite paper for 4-NP and (b) The kinetic curves for Ag/ANFs-1:10 composite paper for absorption of 4-NP

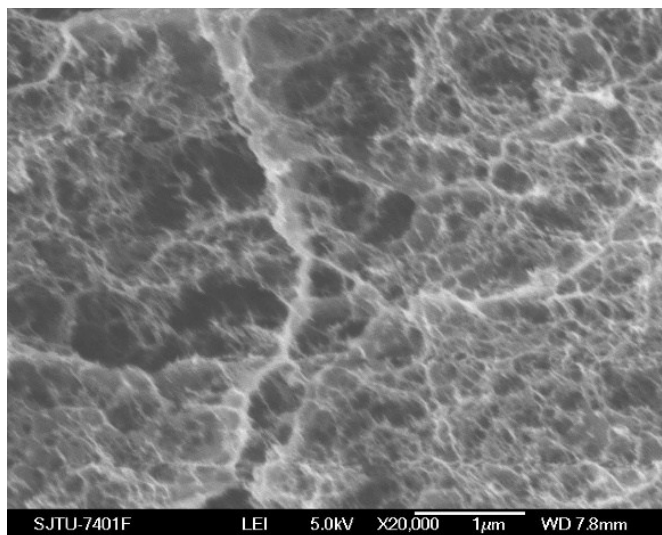

**Figure S7. SEM image of freeze-dried ANF paper.**
